# Supplementary material for: Biomathematical Description of Synthetic Peptide Libraries
Source: PLoS One. 2015 Jun 4;10(6):e0129200. doi: 10.1371/journal.pone.0129200 (PMC4456392; doi:10.1371/journal.pone.0129200)
Supplement: S5 Table — (XLS) [file pone.0129200.s010.xls]

## Sheet: Sheet1
S5 Table. Inclusion probabilities of specific heptapeptide sequences (degree 0) and first and second degree neighborhoods (degree 1 and degree 2) under different library schemes in a library of size 100 Million DNA Sequences.
peptide	degree	NNN-C	NNB-C	NNK/S-C	20/20-C
SLRSLRS	0	1	0.9998	1	0.1058
	1	1	1	1	0.8507
	2	1	1	1	1
NEAREST	0	0.169	0.0918	0.1518	0.1058
	1	0.9099	0.765	0.8823	0.7912
	2	1	1	1	1
HENNING	0	0.0153	0.0254	0.0091	0.1058
	1	0.1775	0.2931	0.1282	0.7388
	2	0.7112	0.893	0.6065	0.9996
MMMMMMM	0	0	0.0003	0.0046	0.1058
	1	0.0037	0.017	0.1785	0.9147
	2	0.1361	0.3765	0.9741	1
